# Supplementary material
Source: PubMed Central journal article supplement (PMC4001929)
Supplement: NIHMS558155-supplement-supplement_1.pdf [file NIHMS558155-supplement-supplement_1.pdf]

ON-LINE APPENDICES

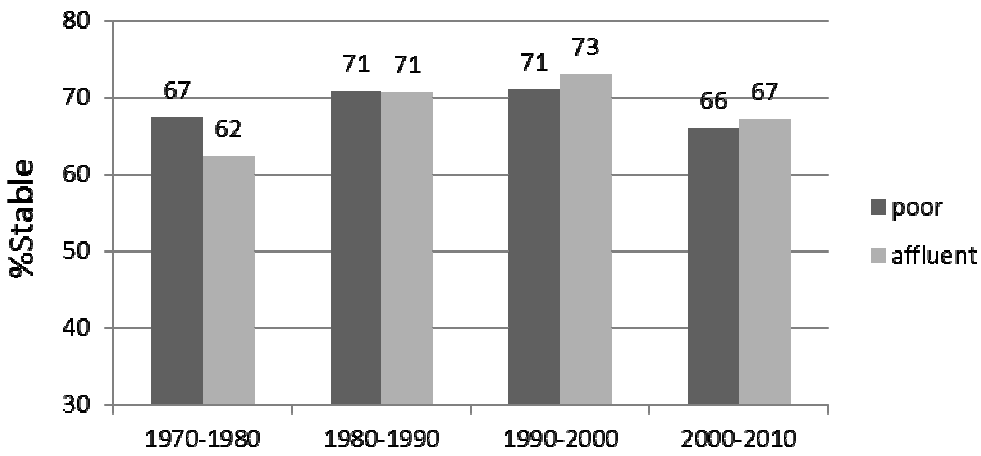

Figure A1. Poor and Affluent Neighborhood Persistence within Cities over Time, 1970-2010.

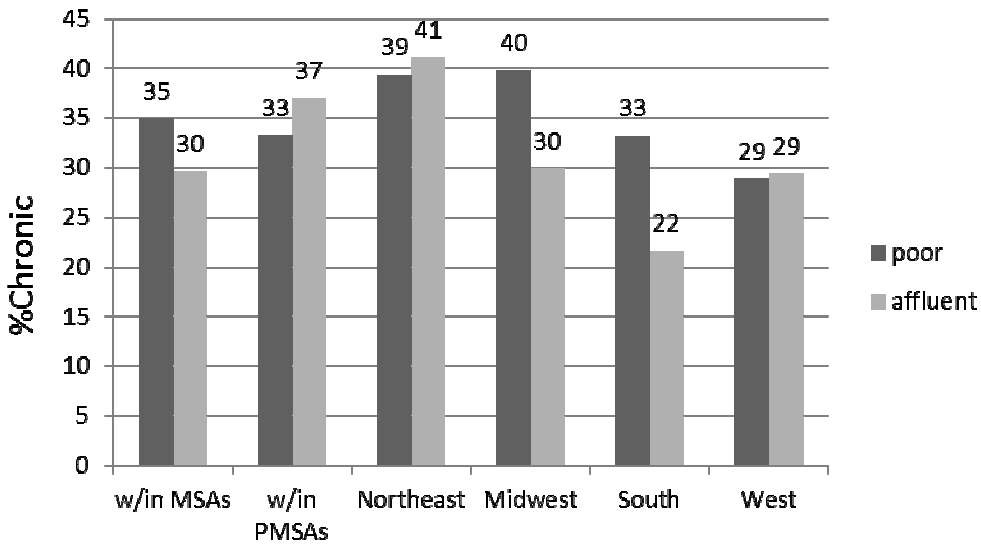

Figure A2. Proportion of Chronically Poor and Persistently Affluent Neighborhoods, given that state in 1970, for all MSAs, PMSAs, and Region.



TABLE A1. Percent of Poor and Affluent Neighborhood Persistence Over Time by Region

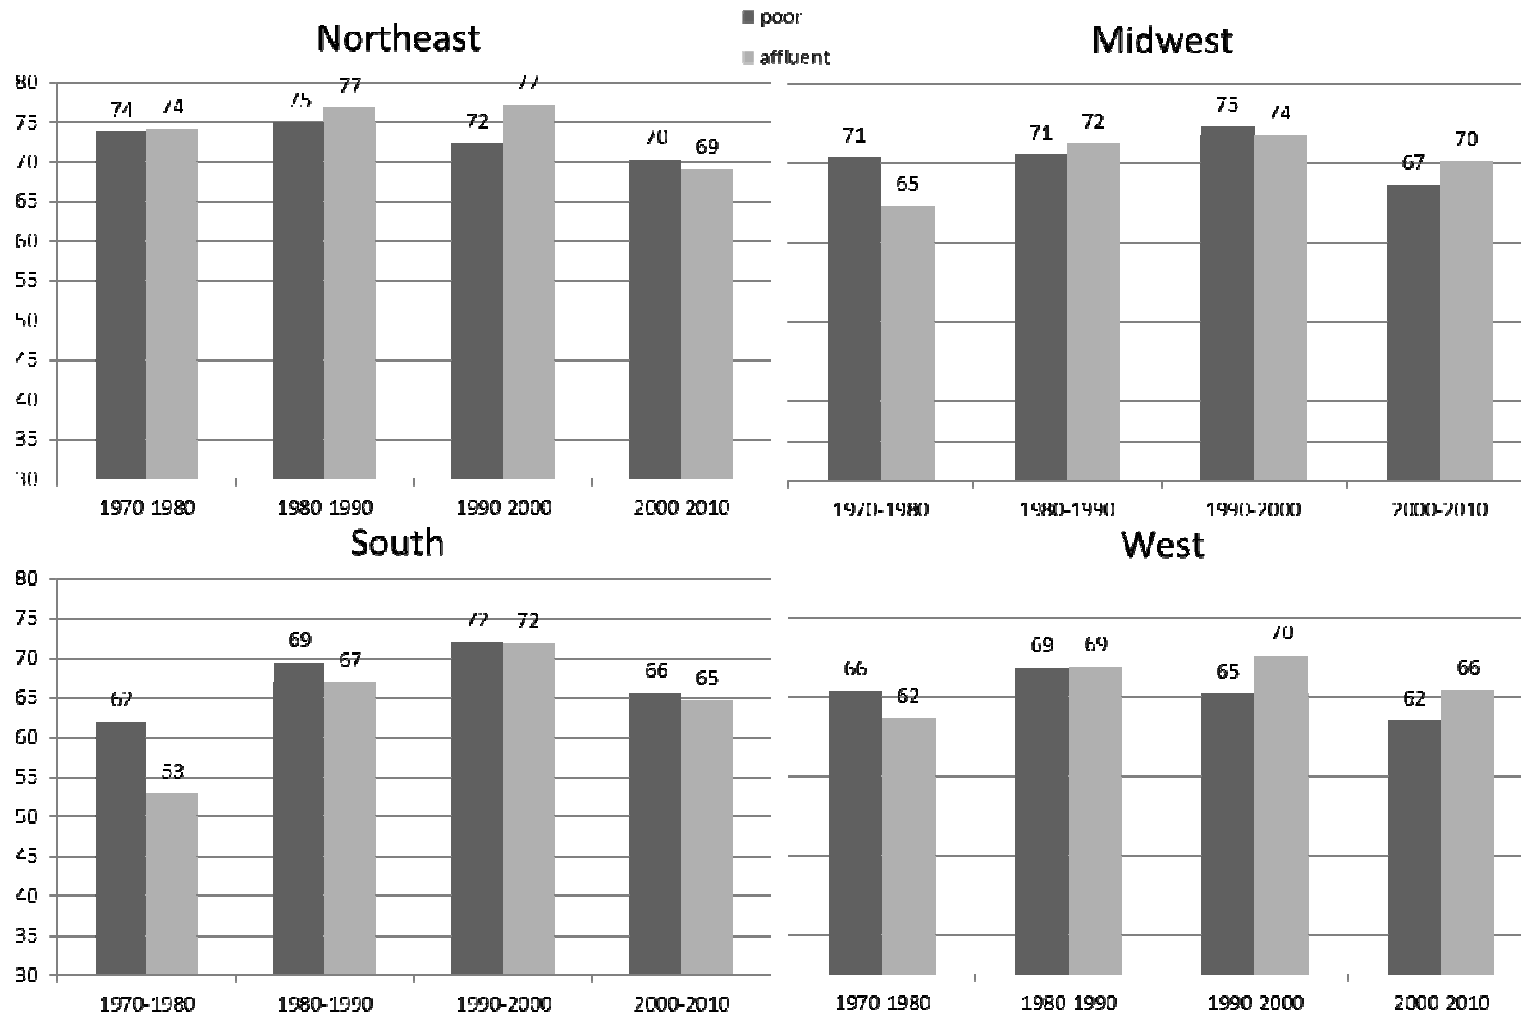



TABLE A2.

Table A2. Goodness-of-Fit Statistics for Loglinear Models of the Association among Neighborhood Origin and Destination by Time Period (N=48,596)

| Model                       | $\Delta$ | $L^2$  | BIC    | p     | d.f. |
|-----------------------------|----------|--------|--------|-------|------|
| (1) [IO] [ID] [OD]          | 1.20     | 590.03 | 443.89 | 0.000 | 12   |
| (3) [IO] [ID] [OD] [IDiag]  | 0.44     | 319.30 | 209.70 | 0.000 | 9    |
| (4) [IO] [ID] [OD] [IDiag2] | 0.09     | 142.75 | 106.22 | 0.000 | 3    |

Note: Results suggest model (4) is the preferred model.
